# Supplementary material for: C2O42−-templated cage-shaped Ln28(Ln = Gd, Eu) nanoclusters with magnetocaloric effect and luminescence
Source: Royal Society of Chemistry journal article supplement (doi:10.1039/d3qi00743j), 2023-01-01
Supplement: d3qi00743j1.pdf [file d3qi00743j1.pdf]

# Supporting Information

## **C<sub>2</sub>O<sub>4</sub><sup>2-</sup>-templated cage-shaped Ln<sub>28</sub> (Ln=Gd, Eu) nanoclusters with magnetocaloric effect and luminescence**

Qin Wang,<sup>1</sup> Sheng-Hui Lu,<sup>1</sup> Ling-Xi Xu,<sup>2</sup> Ji-Lei Wang,<sup>1</sup> Ya-Ting Yu,<sup>1</sup> Xu Bai,<sup>1</sup> Hua Mei,<sup>1</sup> and Yan Xu<sup>1,\*</sup>

<sup>1</sup>*College of Chemical Engineering, State Key Laboratory of Materials-Oriented Chemical Engineering, Nanjing Tech University, Nanjing 211816, P.R. China.*

<sup>2</sup>*College of software, Jilin University, Changchun 130012, P. R. China.*

Corresponding Author\* [yanxu@njtech.edu.cn](mailto:yanxu@njtech.edu.cn)

## Experimental Section

(a)

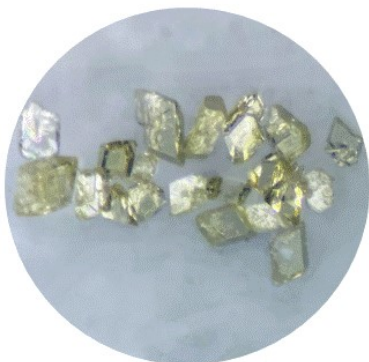

(b)

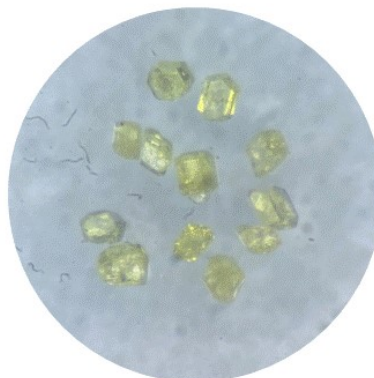

**Fig. S1** The images of (a) **Gd<sub>28</sub>**, (b) **Eu<sub>28</sub>** under optical microscope.

## Structure

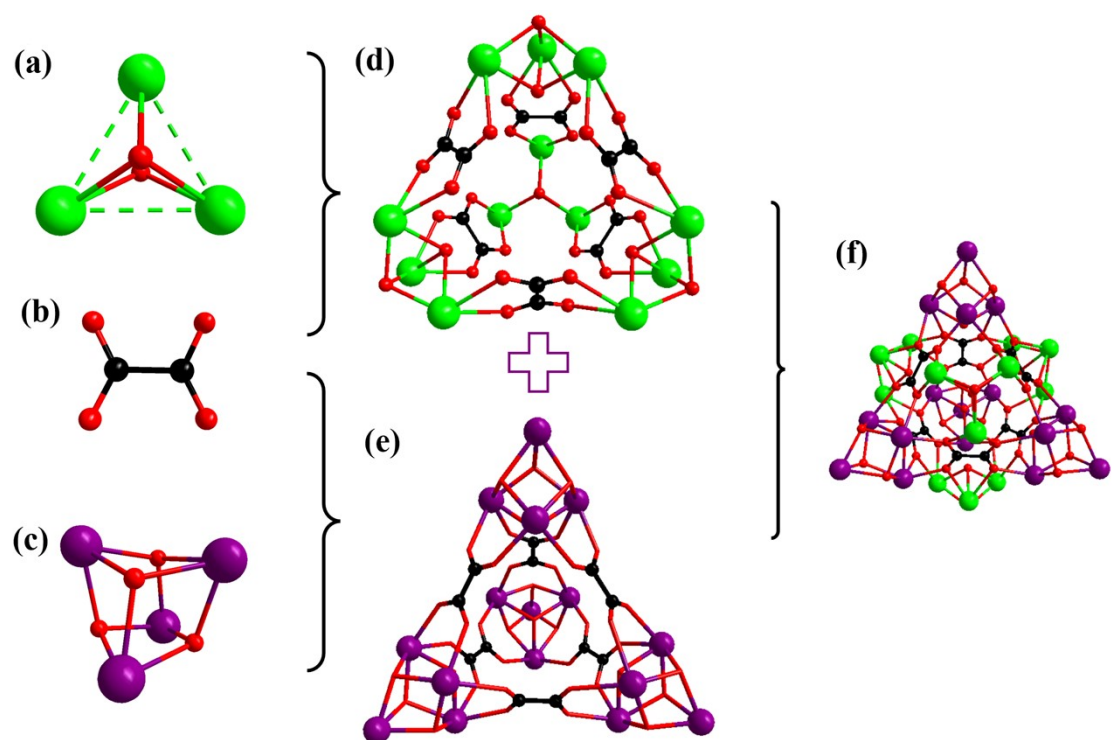

**Fig. S2** Ball-and-stick view of (a)  $[\text{Gd}_3(\mu_3\text{-OH})_2]^{7+}$  unit; (b)  $\text{C}_2\text{O}_4^{2-}$  anion; (c)  $[\text{Gd}_4(\mu_3\text{-OH})_4]^{8+}$  unit; (d)  $[\text{Gd}_{12}(\mu_3\text{-OH})_8(\text{C}_2\text{O}_4)_6]^{16+}$  subunit; (e)  $[\text{Gd}_{16}(\mu_3\text{-OH})_{16}(\text{C}_2\text{O}_4)_6]^{20+}$  subunit; (f)  $[\text{Gd}_{28}(\text{C}_2\text{O}_4)_6(\mu_3\text{-OH})_{36}(\mu_2\text{-OH})_2]^{34+}$ .

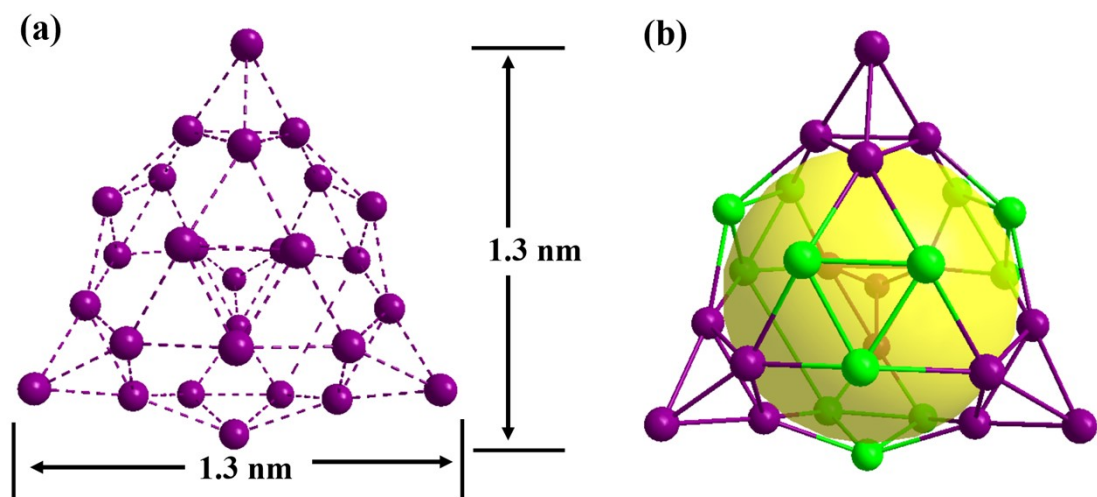

**Fig. S3** The metal skeleton of  $\text{Gd}_{28}$ .

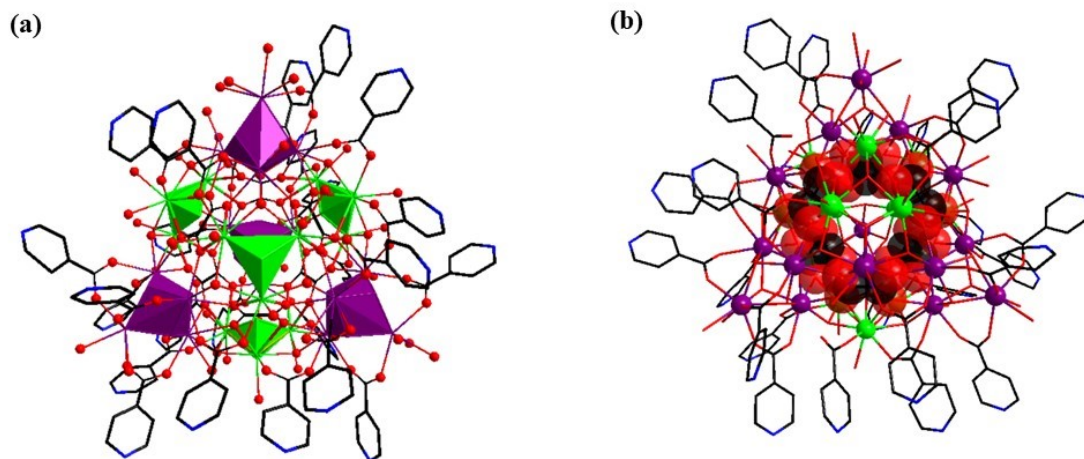

**Fig. S4** Representation of **Gd<sub>28</sub>** based on (a) **Gd<sub>3</sub>** and **Gd<sub>4</sub>** unit (b) **C<sub>2</sub>O<sub>4</sub><sup>2-</sup>** anionic templates.

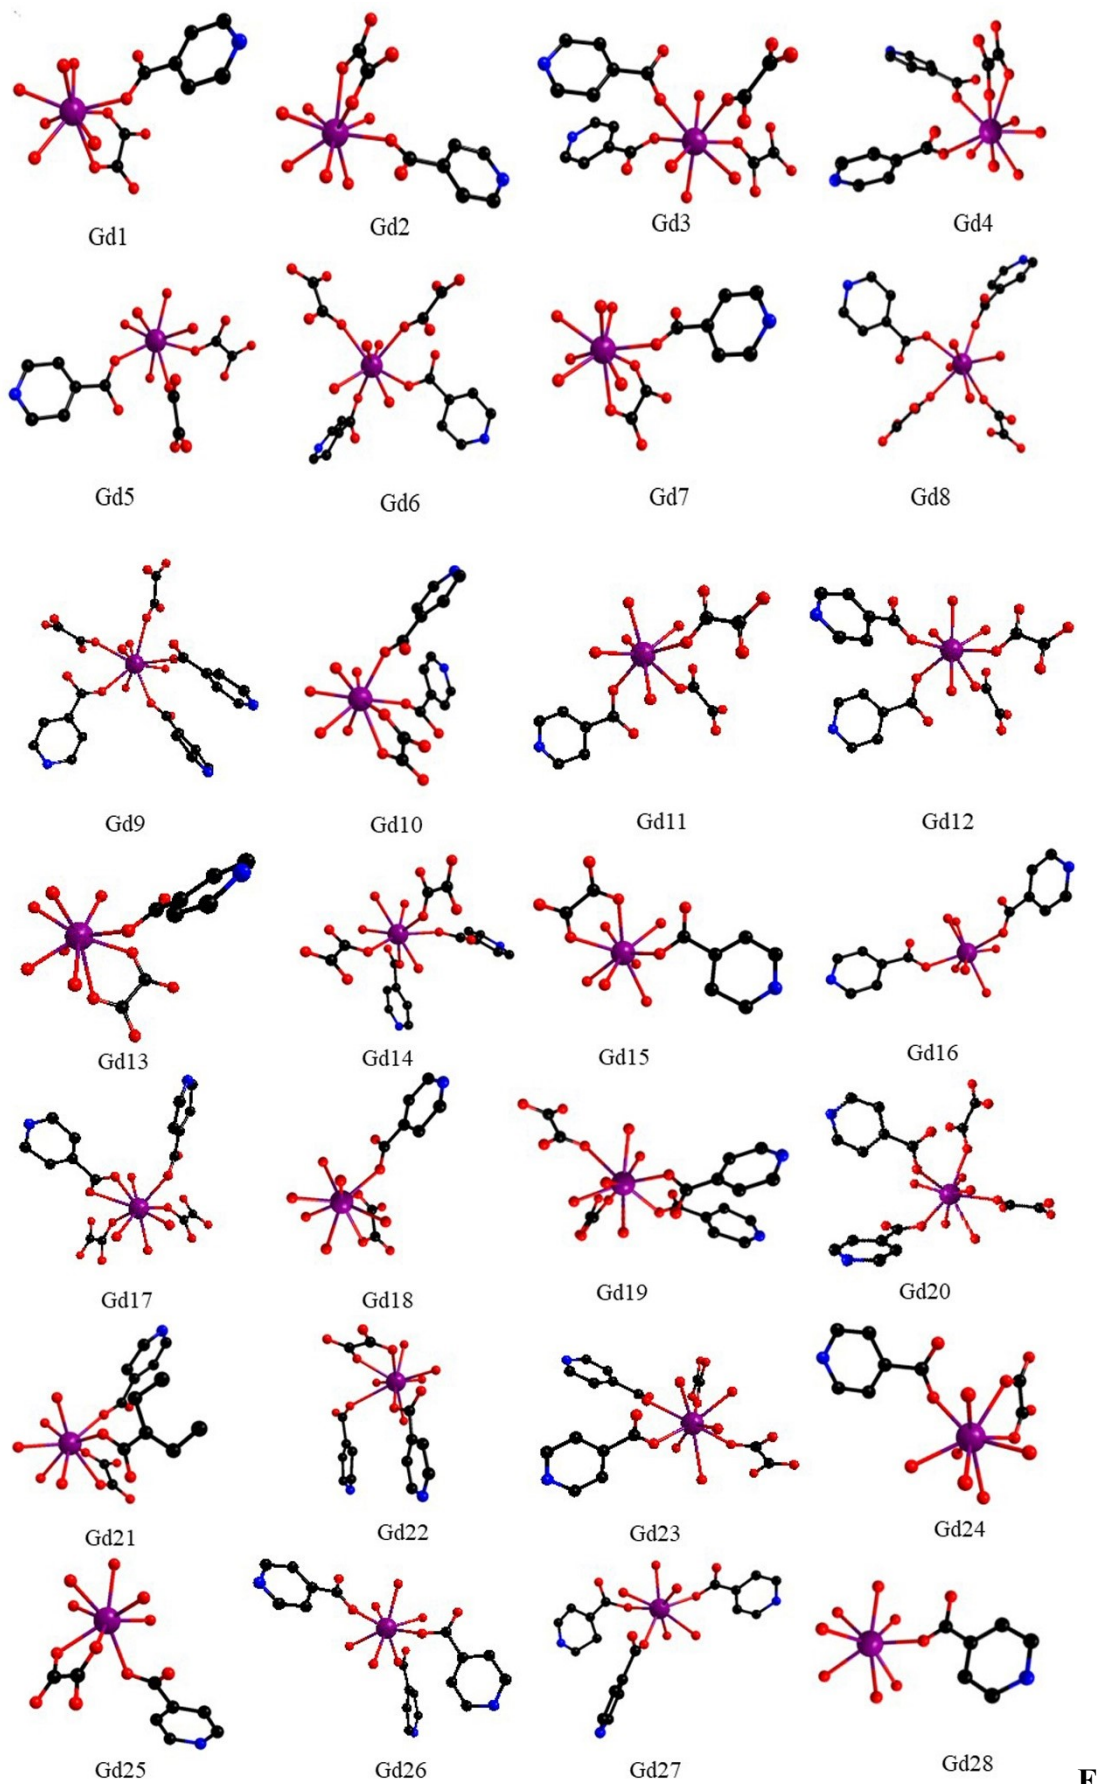

**F**

ig. S5 Coordination environments of 28 different Gd<sup>III</sup> ions.

**Table S1.** The CShM (Continuous Shape Measures) values of eight-coordination of Gd<sup>III</sup> ions in Gd<sub>28</sub>.

|      | Octagon  | Heptagonal pyramid | Hexagonal bipyramid | Cube     | Square antiprism | Triangular dodecahedron | Johnson-Gyrobifastigium J26 | Johnson-Elongated triangular bipyramid J14 | Johnson-Biaugmented trigonal prism J50 | Biaugmented trigonal prism | Snub diphenoïd J84 | Triakis tetrahedron | Elongated trigonal bipyramid |
|------|----------|--------------------|---------------------|----------|------------------|-------------------------|-----------------------------|--------------------------------------------|----------------------------------------|----------------------------|--------------------|---------------------|------------------------------|
| Gd16 | 31.57244 | 23.29306           | 16.96220            | 10.17181 | 2.45775          | <b>0.31430</b>          | 13.56307                    | 29.40452                                   | 2.82168                                | 2.18982                    | 2.49707            | 11.00914            | 25.32895                     |
| Gd8  | 58.09215 | 51.99503           | 46.87071            | 45.98718 | 49.82011         | 48.36206                | 47.60483                    | <b>43.10357</b>                            | 45.00656                               | 46.39710                   | 48.22951           | 46.33355            | 47.12274                     |
| Gd12 | 28.99820 | 23.67745           | 16.13101            | 10.46344 | 2.14151          | <b>0.80577</b>          | 14.23738                    | 28.22626                                   | 2.62350                                | 1.80749                    | 3.22529            | 11.25575            | 23.15551                     |
| Gd3  | 30.70519 | 23.31967           | 14.41076            | 9.57658  | 2.70619          | <b>0.83199</b>          | 13.80598                    | 28.11689                                   | 2.72063                                | 1.93110                    | 3.45059            | 10.33901            | 22.96524                     |
| Gd14 | 44.78659 | 38.57630           | 43.27928            | 43.26096 | 43.54551         | 43.14939                | 38.00744                    | <b>33.10107</b>                            | 38.15059                               | 38.84904                   | 35.47430           | 39.42785            | 40.07003                     |
| Gd6  | 28.76705 | 24.16349           | 16.28630            | 9.85993  | 1.92066          | <b>0.64540</b>          | 14.86619                    | 28.79118                                   | 3.04664                                | 2.11437                    | 3.47886            | 10.46608            | 23.58522                     |
| Gd26 | 30.23454 | 24.08236           | 16.88696            | 9.88705  | 2.18320          | <b>0.40640</b>          | 12.79257                    | 29.24734                                   | 2.24312                                | 1.81316                    | 2.10115            | 10.41697            | 24.58076                     |
| Gd27 | 29.55541 | 23.61301           | 15.88942            | 10.15675 | 1.91876          | <b>1.04234</b>          | 13.37332                    | 27.23162                                   | 1.60927                                | 1.19297                    | 2.81509            | 10.74322            | 22.91530                     |
| Gd28 | 22.69508 | 23.43771           | 16.80728            | 11.34599 | <b>1.11197</b>   | 3.14065                 | 14.44132                    | 25.21684                                   | 2.93171                                | 2.48548                    | 5.11699            | 12.05596            | 20.67076                     |
| Gd11 | 31.37728 | 22.82900           | 15.49588            | 9.77657  | 3.18784          | <b>0.74079</b>          | 14.99344                    | 28.79753                                   | 3.10827                                | 1.98741                    | 3.95448            | 10.22424            | 23.71704                     |
| Gd5  | 27.85828 | 23.95382           | 15.83208            | 9.41022  | 1.73981          | <b>0.94513</b>          | 15.27388                    | 28.08186                                   | 2.87018                                | 1.81651                    | 4.02845            | 9.96920             | 22.42156                     |
| Gd22 | 30.96602 | 22.64395           | 13.98008            | 11.60034 | 4.85064          | 3.66092                 | 9.58619                     | 24.59086                                   | 2.85437                                | <b>1.84665</b>             | 5.21051            | 12.40456            | 19.29079                     |
| Gd25 | 30.19222 | 23.35258           | 17.05882            | 13.34342 | 3.60991          | 2.32018                 | 12.88298                    | 25.75615                                   | 1.75428                                | <b>1.00856</b>             | 3.16702            | 13.47305            | 21.45386                     |

**Table S2.** The CShM (Continuous Shape Measures) values of nine-coordination of Gd<sup>III</sup> ions in Gd<sub>28</sub>.

|      | Enneagon | Octagonal pyramid | Heptagonal bipyramid | Johnson triangular cupola J3 | Capped cube J8 | Spherical-relaxed capped cube | Capped square antiprism J10 J26 | Spherical capped square antiprism J14 | Tricapped trigonal prism J51 trigonal prism J50 | Spherical tricapped trigonal prism | Tridiminished icosahedron J63 | Hula-hoop T | Muffin   |
|------|----------|-------------------|----------------------|------------------------------|----------------|-------------------------------|---------------------------------|---------------------------------------|-------------------------------------------------|------------------------------------|-------------------------------|-------------|----------|
| Gd23 | 36.67895 | 22.44078          | 19.19049             | 16.16553                     | 9.69815        | 9.17781                       | 1.36254                         | 1.00447                               | 1.78258                                         | <b>0.99039</b>                     | 12.83151                      | 11.17741    | 1.30642  |
| Gd20 | 36.06425 | 21.80207          | 18.99208             | 16.37753                     | 9.12616        | 8.63518                       | 1.40016                         | 1.06496                               | 2.37189                                         | <b>0.85709</b>                     | 12.19337                      | 11.08981    | 1.60496  |
| Gd9  | 37.03736 | 21.08640          | 17.69969             | 16.65952                     | 10.21308       | 8.70924                       | 2.57693                         | 1.29014                               | 3.16355                                         | <b>0.62058</b>                     | 11.90255                      | 11.58504    | 1.55821  |
| Gd4  | 35.94429 | 22.97067          | 17.11069             | 14.99922                     | 7.84317        | 7.09962                       | 1.72506                         | <b>1.27777</b>                        | 2.95977                                         | 1.69789                            | 10.92071                      | 9.86830     | 1.78316  |
| Gd19 | 36.67920 | 22.17129          | 17.42200             | 16.72087                     | 8.69130        | 7.72734                       | 2.30843                         | 1.39112                               | 2.80759                                         | <b>0.99565</b>                     | 13.26578                      | 10.07724    | 1.41096  |
| Gd21 | 43.02343 | 33.06960          | 31.79243             | 23.23462                     | 25.04451       | 25.31343                      | <b>20.65182</b>                 | 20.86608                              | 20.96080                                        | 21.09692                           | 26.97353                      | 28.19029    | 21.35039 |
| Gd13 | 63.28090 | 58.25949          | 56.63662             | 54.42950                     | 49.61953       | 55.67917                      | <b>47.05175</b>                 | 53.83618                              | 48.30373                                        | 54.25396                           | 54.55605                      | 55.00210    | 53.06404 |
| Gd24 | 33.82836 | 21.63958          | 16.69124             | 14.96467                     | 8.84803        | 8.05750                       | 1.70199                         | <b>1.06731</b>                        | 3.08628                                         | 1.80431                            | 12.69559                      | 9.80164     | 1.50842  |
| Gd10 | 36.17768 | 23.42041          | 17.23778             | 14.64841                     | 7.58813        | 6.91348                       | 1.38227                         | <b>0.97006</b>                        | 3.32150                                         | 2.07949                            | 10.70363                      | 11.31211    | 1.70320  |
| Gd7  | 33.55453 | 22.42499          | 18.09518             | 13.58033                     | 9.77277        | 8.83270                       | 1.76147                         | <b>0.91942</b>                        | 1.77412                                         | 1.31445                            | 12.61838                      | 11.48950    | 1.43830  |
| Gd15 | 34.84055 | 20.93221          | 17.16954             | 15.83306                     | 10.65338       | 9.38573                       | 2.11519                         | <b>1.21141</b>                        | 3.34717                                         | 1.42565                            | 11.05302                      | 10.26849    | 1.26485  |
| Gd18 | 35.39423 | 22.54196          | 19.69406             | 15.41679                     | 11.25483       | 10.04386                      | 1.65672                         | <b>0.70204</b>                        | 3.11966                                         | 1.83977                            | 11.70083                      | 10.76745    | 1.34002  |
| Gd2  | 34.73584 | 22.06043          | 17.43797             | 13.90846                     | 10.02244       | 9.09152                       | 1.82951                         | <b>1.14580</b>                        | 1.97125                                         | 1.18065                            | 12.01613                      | 12.22453    | 1.50683  |
| Gd1  | 34.34913 | 21.82234          | 17.31980             | 13.61914                     | 9.42099        | 8.52795                       | 1.52918                         | <b>0.89866</b>                        | 1.93312                                         | 1.31582                            | 11.98333                      | 11.92160    | 1.50423  |
| Gd17 | 34.25488 | 21.19019          | 16.73164             | 15.88556                     | 8.48350        | 7.75421                       | 2.97965                         | 2.55570                               | 3.43371                                         | <b>2.14413</b>                     | 12.77926                      | 8.73959     | 2.30066  |

## PXRD pattern

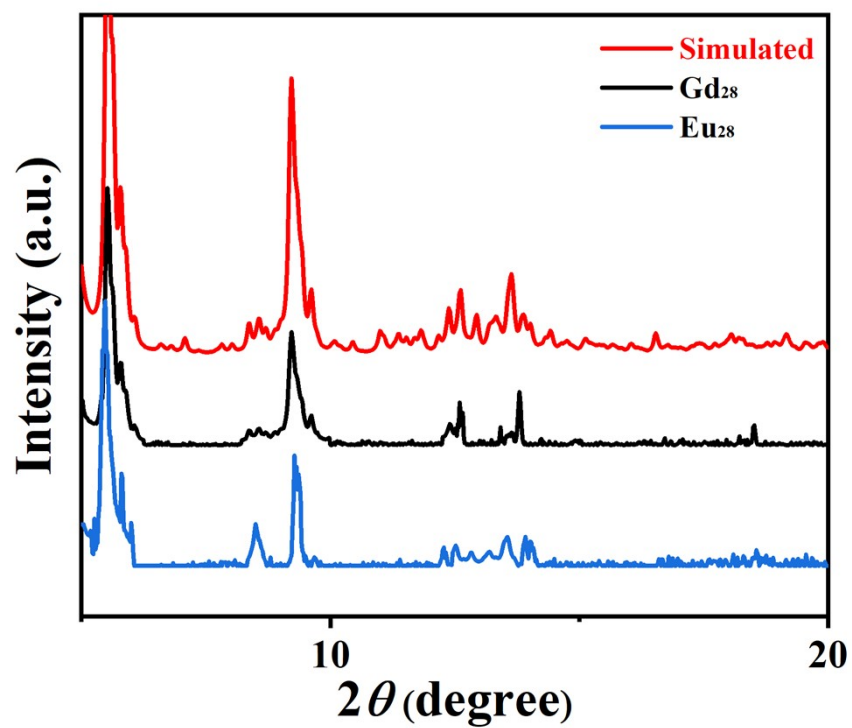

Fig. S6 The PXRD pattern of **Gd<sub>28</sub>** and **Eu<sub>28</sub>** at  $2\theta = 5\text{-}20^\circ$ .



## IR spectrum

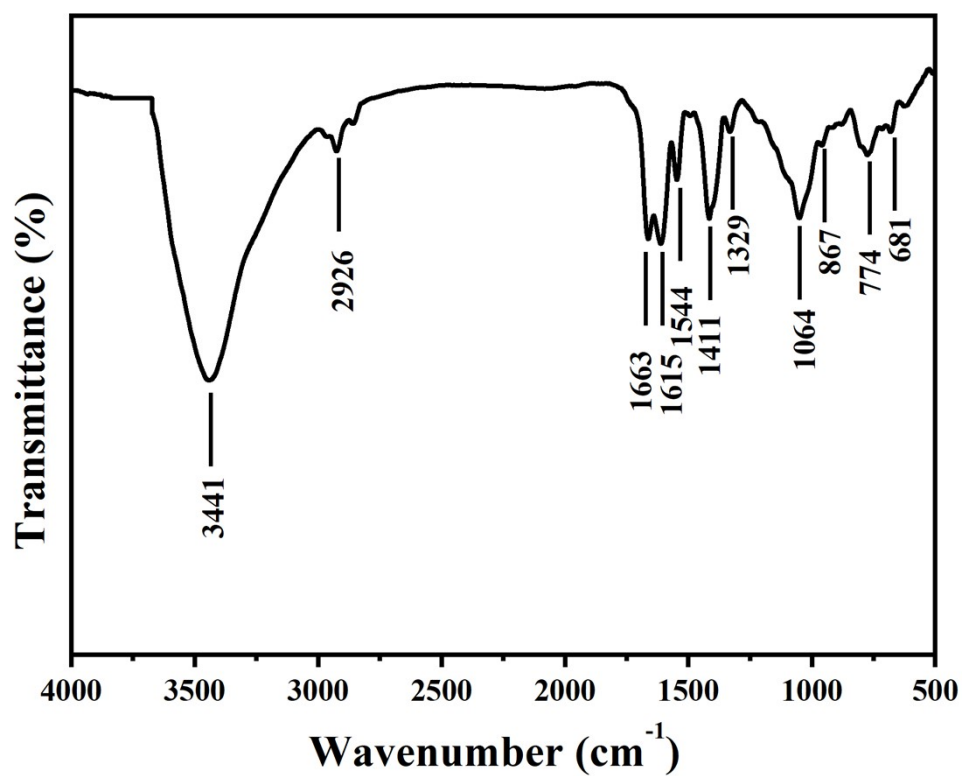

Fig. S7 The IR spectrum of Gd<sub>28</sub>.

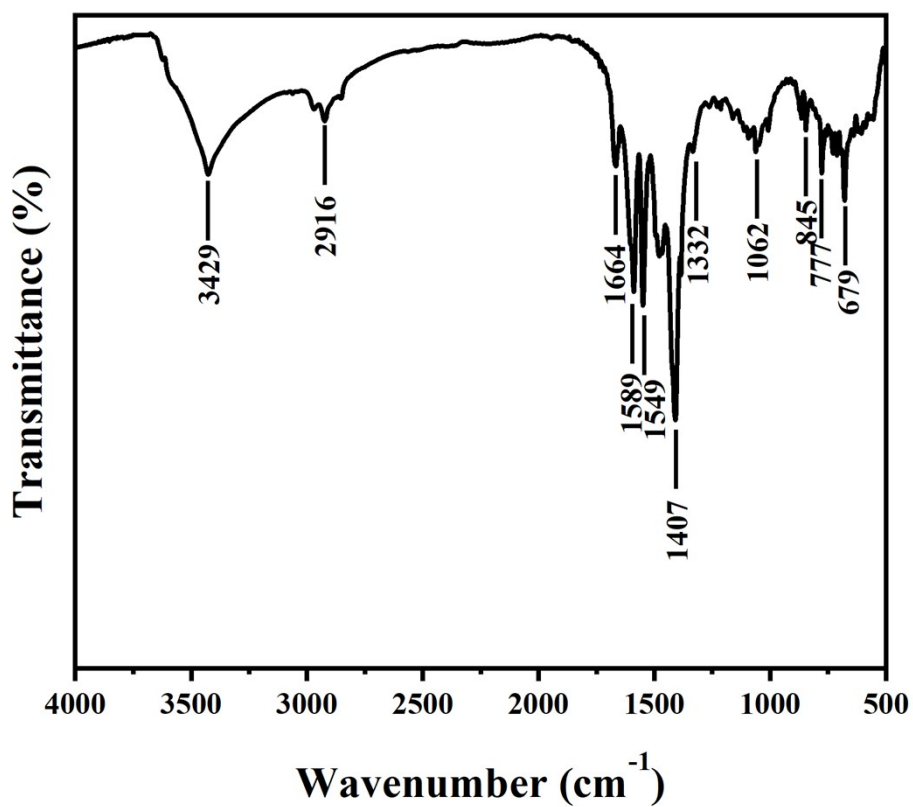

Fig. S8 The IR spectrum of Eu<sub>28</sub>.

As presented in Fig. S7-8, the IR spectra patterns of **Gd**<sub>28</sub> and **Eu**<sub>28</sub> at 4000-400 cm<sup>-1</sup> are almost the same. So only the infrared spectrum of **Gd**<sub>28</sub> is discussed in detail. The broad and strong absorption peak in the field of 3441 cm<sup>-1</sup> ascribes to the -OH of H<sub>2</sub>O molecules and the characteristic peak at 2926 cm<sup>-1</sup> belongs to the signature of  $\nu(\text{C-H})$ , while the stretching vibration peak at 1663 cm<sup>-1</sup> reveal the presence of the pyridine ring. In addition, the characteristic peaks of symmetric and antisymmetric stretching vibration on -COO<sup>-</sup> groups appear at 1411 cm<sup>-1</sup> and 1544 cm<sup>-1</sup>. The peak at 867-681 cm<sup>-1</sup> corresponds to the characteristic peak of the  $\nu(\text{Gd-O})$ . The mentioned infrared peaks above are consistent with those of lanthanide clusters previously reported in the literature.

TG

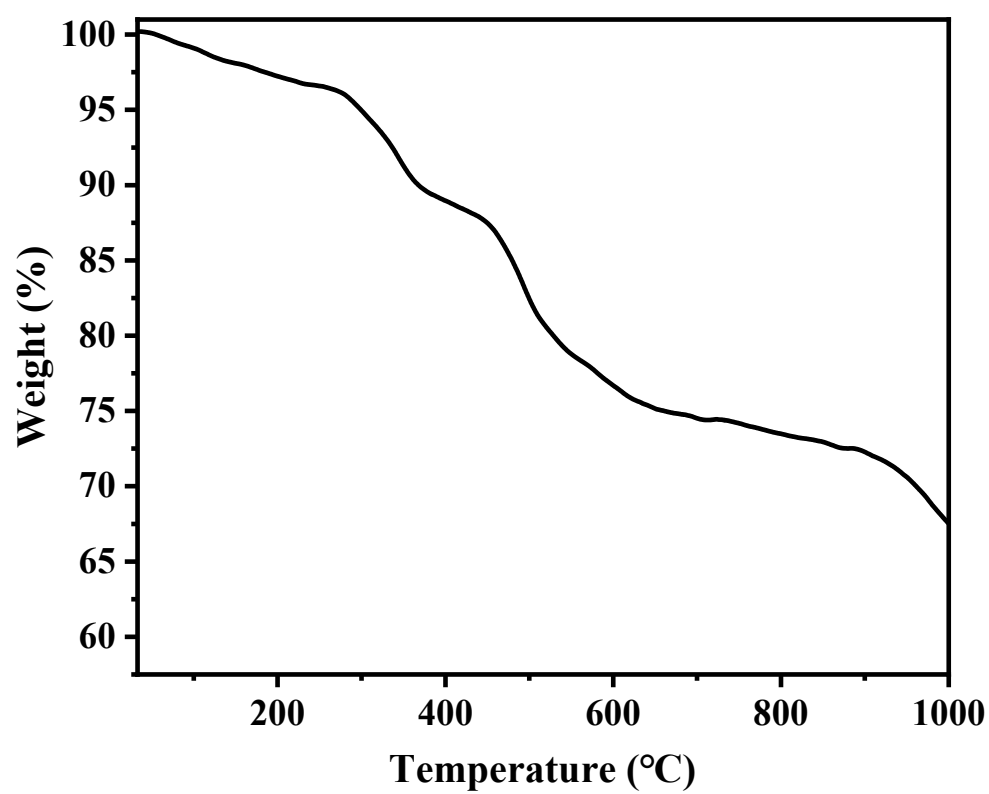

Fig. S9 TGA curve of Gd<sub>28</sub>.

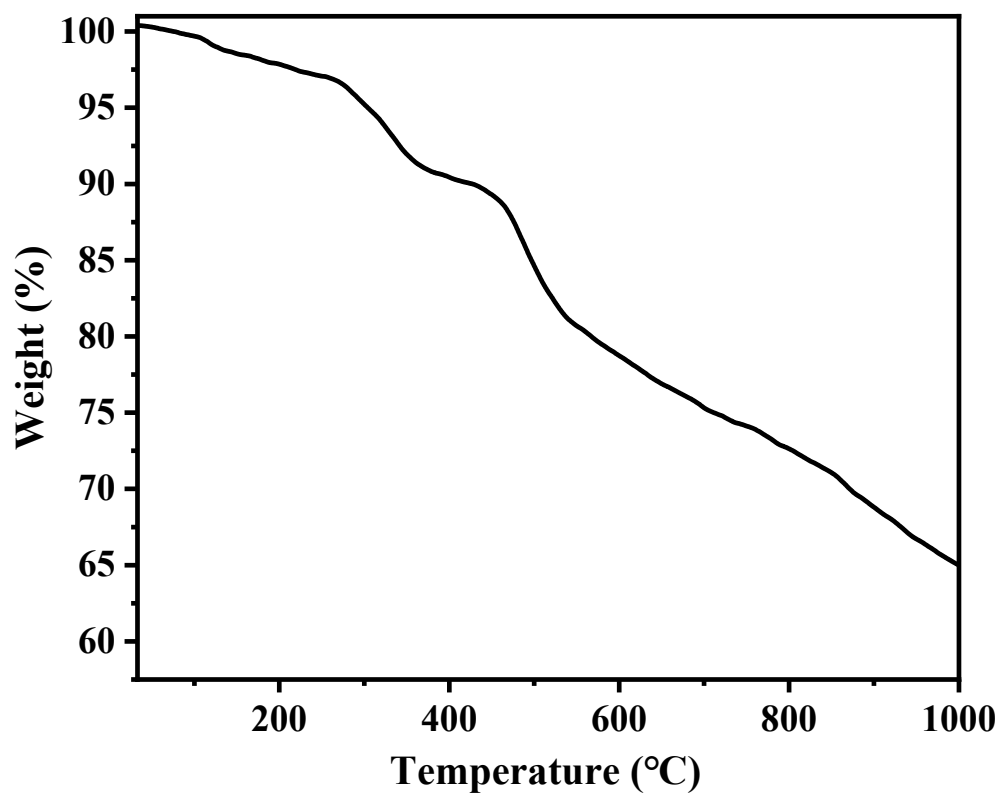

Fig. S10 TGA curve of Eu<sub>28</sub>.

## EDS

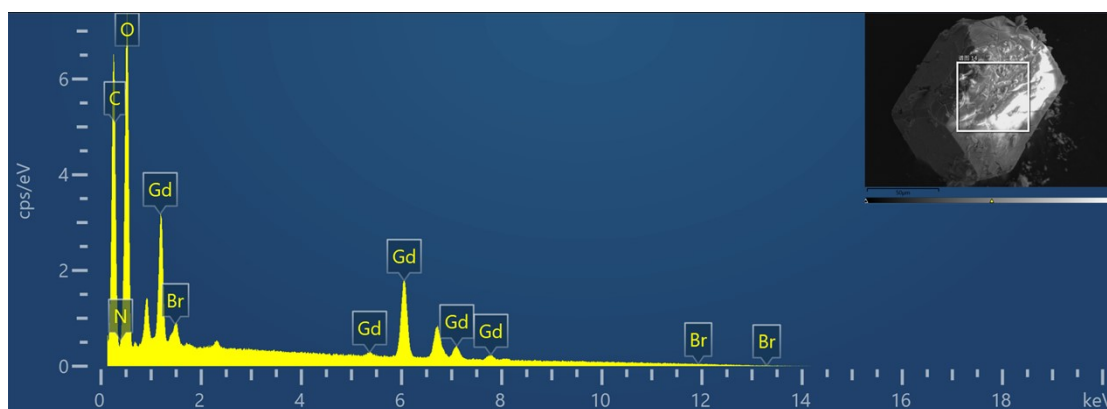

**Fig. S11** The EDS measurement of compound  $Gd_{28}$ .

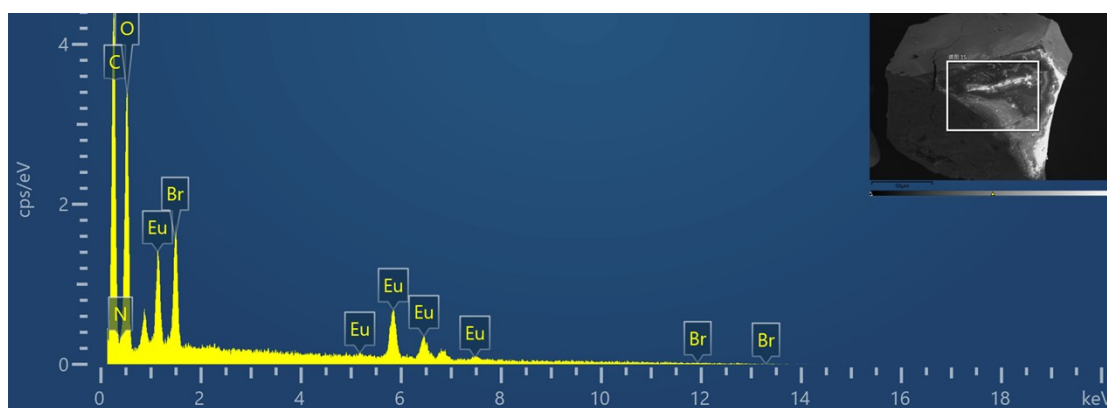

**Fig. S12** The EDS measurement of compound  $Eu_{28}$ .

## Luminescence of $\text{Eu}_{28}$

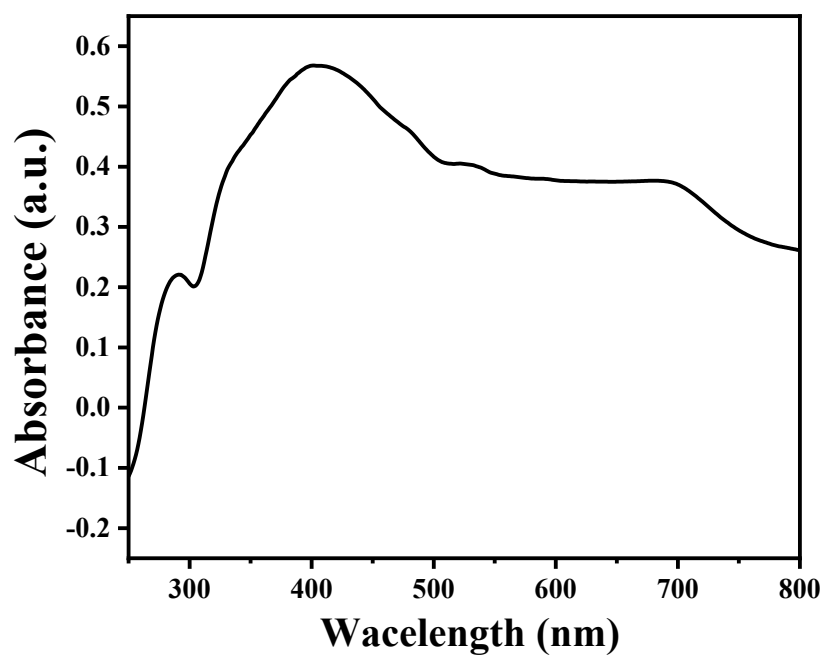

**Fig. S13** The solid-state UV-absorption spectra in the wavelength range 250-800 nm for  $\text{Eu}_{28}$ .

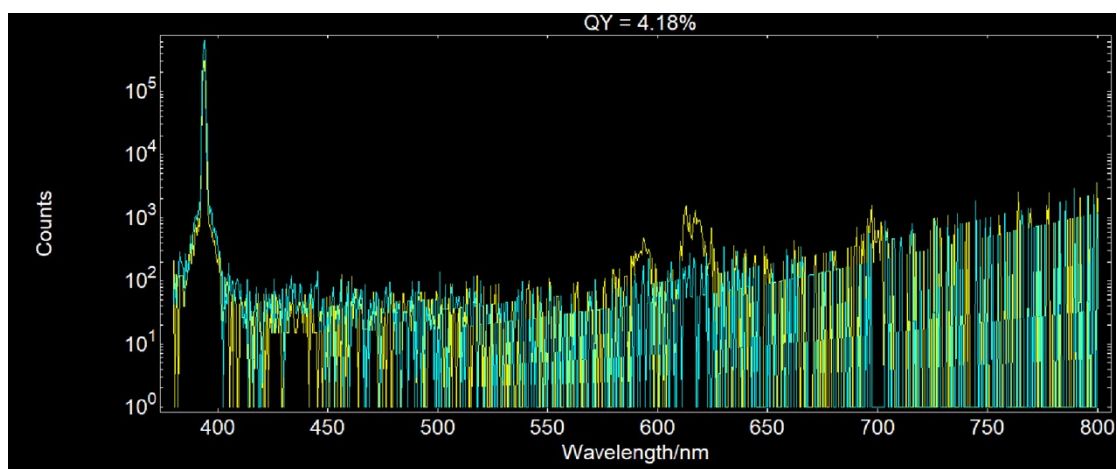

**Fig. S14** The solid-state photoluminescence quantum yield for  $\text{Eu}_{28}$ .

## Magnetic property of Gd<sub>28</sub>

**Table S3** Summary  $-\Delta S_m$  for some reported 4f and 3d-4f clusters

| Compound                                                            | $-\Delta S_m^{\max}$<br>(J kg <sup>-1</sup> K <sup>-1</sup> ) | $T$<br>(K) | $\Delta H$<br>(T) | Ref.             |
|---------------------------------------------------------------------|---------------------------------------------------------------|------------|-------------------|------------------|
| <b>{Gd<sub>28</sub>}</b>                                            | <b>37.5</b>                                                   | <b>2.0</b> | <b>7.0</b>        | <b>This work</b> |
| {Gd <sub>27</sub> }                                                 | 41.8                                                          | 2.0        | 7.0               | 1                |
| {Gd <sub>32</sub> }                                                 | 43.0                                                          | 2.0        | 7.0               | 2                |
| {Gd <sub>36</sub> }                                                 | 39.7                                                          | 2.5        | 7.0               | 3                |
| {Gd <sub>37</sub> }                                                 | 38.7                                                          | 2.0        | 7.0               | 4                |
| {Gd <sub>38</sub> }                                                 | 37.9                                                          | 1.8        | 7.0               | 5                |
| {Gd <sub>60</sub> }                                                 | 48.0                                                          | 2.0        | 7.0               | 6                |
| {Gd <sub>104</sub> }                                                | 46.9                                                          | 2.0        | 7.0               | 7                |
| {Gd <sub>140</sub> }                                                | 38.0                                                          | 2.0        | 7.0               | 8                |
| {Gd <sub>23</sub> Ni <sub>20</sub> }                                | 38.1                                                          | 2.0        | 7.0               | 9                |
| {Gd <sub>36</sub> Ni <sub>12</sub> }                                | 36.3                                                          | 3.0        | 7.0               | 10               |
| {Co <sup>II</sup> <sub>9</sub> Co <sup>III</sup> Gd <sub>42</sub> } | 41.26                                                         | 2.0        | 7.0               | 11               |
| {Co <sup>II</sup> Co <sup>III</sup> <sub>6</sub> Gd <sub>18</sub> } | 36.90                                                         | 2.0        | 7.0               | 12               |

**Table S4** Summary of the reported lanthanide clusters with isonicotinic ligand

| Compound          | Formula                                                                                                                                                                                                                                                                                                                                                                                                   | Dimensionality | Ref. |
|-------------------|-----------------------------------------------------------------------------------------------------------------------------------------------------------------------------------------------------------------------------------------------------------------------------------------------------------------------------------------------------------------------------------------------------------|----------------|------|
| Ln                | [Ln(IN)(CO <sub>3</sub> )(H <sub>2</sub> O)] (Ln = La, Eu)                                                                                                                                                                                                                                                                                                                                                | 2D             | 13   |
| Ln                | [Ln(IN) <sub>2</sub> L] (Ln = Eu, Tb, Er, Dy, Ho, Gd, La, L = OCH <sub>2</sub> CH <sub>2</sub> OH)                                                                                                                                                                                                                                                                                                        | 1D             | 14   |
| Ln                | <sub>L-/D-</sub> {Ln[IN][HIN][CH <sub>2</sub> OCH <sub>2</sub> O]} <sub>n</sub> (Ln = Gd, Dy)                                                                                                                                                                                                                                                                                                             | 1D             | 15   |
| Ln <sub>3</sub>   | [Ln <sub>3</sub> (IN) <sub>2</sub> (bdc) <sub>3.5</sub> (H <sub>2</sub> O) <sub>3</sub> ]·0.5H <sub>2</sub> O (Ln = Er, Ho)                                                                                                                                                                                                                                                                               | 3D             | 16   |
| Ln <sub>3</sub>   | [Ln <sub>3</sub> (IN) <sub>3</sub> (μ <sub>3</sub> -OH)(HIDA)(IDA) <sub>2</sub> ] <sub>n</sub> (Ln = Eu, Sm)                                                                                                                                                                                                                                                                                              | 2D             | 17   |
| Ln <sub>4</sub>   | {[Nd <sub>4</sub> (ox) <sub>4</sub> (NO <sub>3</sub> ) <sub>2</sub> (OH) <sub>2</sub> (H <sub>2</sub> O) <sub>2</sub> ]·5H <sub>2</sub> O} <sub>n</sub>                                                                                                                                                                                                                                                   | 3D             | 18   |
| Ln <sub>8</sub>   | [Ln <sub>8</sub> (IN) <sub>14</sub> (μ <sub>3</sub> -OH) <sub>8</sub> (μ <sub>2</sub> -OH) <sub>2</sub> (H <sub>2</sub> O) <sub>8</sub> ]·xH <sub>2</sub> O (Ln = 1-Gd, Ln = 2-Dy, Ln = 3-Eu).                                                                                                                                                                                                            | 0D             | 19   |
| Ln <sub>18</sub>  | {[Gd <sub>18</sub> (IN) <sub>20</sub> (HCOO) <sub>8</sub> (μ <sub>6</sub> -O)(μ <sub>3</sub> -OH) <sub>24</sub> (H <sub>2</sub> O) <sub>4</sub> ]·4H <sub>2</sub> O} <sub>n</sub><br>{[Eu <sub>18</sub> (IN) <sub>16</sub> (HCOO) <sub>8</sub> (CH <sub>3</sub> COO) <sub>4</sub> (μ <sub>6</sub> -O)(μ <sub>3</sub> -OH) <sub>24</sub> (H <sub>2</sub> O) <sub>4</sub> ]·5H <sub>2</sub> O} <sub>n</sub> | 3D             | 20   |
| Ln <sub>26</sub>  | [Ho <sub>26</sub> (IN) <sub>28</sub> (CH <sub>3</sub> COO) <sub>4</sub> (CO <sub>3</sub> ) <sub>10</sub> (OH) <sub>26</sub> (H <sub>2</sub> O) <sub>18</sub> ]·20H <sub>2</sub> O<br>[Er <sub>26</sub> (IN) <sub>29</sub> (CH <sub>3</sub> COO) <sub>3</sub> (CO <sub>3</sub> ) <sub>10</sub> (OH) <sub>26</sub> (H <sub>2</sub> O) <sub>19</sub> ]·26H <sub>2</sub> O                                    | 0D             | 21   |
| Ho <sub>48</sub>  | K <sub>2</sub> [Ho <sub>48</sub> (IN) <sub>46</sub> (μ <sub>3</sub> -OH) <sub>84</sub> (μ <sub>4</sub> -OH) <sub>4</sub> (μ <sub>5</sub> -O) <sub>2</sub> (OAc) <sub>4</sub> (H <sub>2</sub> O) <sub>14</sub> (CO <sub>3</sub> )Br <sub>2</sub> ]·2HIN·20H <sub>2</sub> O                                                                                                                                 | 2D             | 22   |
| Dy <sub>30</sub>  | Dy <sub>30</sub> I(IN) <sub>41</sub> (μ <sub>3</sub> -OH) <sub>24</sub> (μ <sub>3</sub> -O) <sub>6</sub> (NO <sub>3</sub> ) <sub>9</sub> (OH) <sub>3</sub> (H <sub>2</sub> O) <sub>38</sub>                                                                                                                                                                                                               | 0D             | 23   |
| Dy <sub>104</sub> | Dy <sub>104</sub> I <sub>4</sub> (IN) <sub>125</sub> (μ <sub>3</sub> -OH) <sub>80</sub> (μ <sub>3</sub> -O) <sub>24</sub> (NO <sub>3</sub> ) <sub>36</sub> (OH) <sub>19</sub> (H <sub>2</sub> O) <sub>167</sub>                                                                                                                                                                                           |                |      |

**Table S5** Selected bond lengths (Å) and bond angles (°) of main metal atoms for **Gd<sub>28</sub>**.

|                   |           |                     |           |
|-------------------|-----------|---------------------|-----------|
| Gd(1)-O(39)       | 2.345(9)  | Gd(15)-O(13)        | 2.377(9)  |
| Gd(1)-O(27)       | 2.599(10) | Gd(15)-O(28)        | 2.376(10) |
| Gd(2)-O(91)       | 2.388(10) | Gd(16)-O(44)        | 2.384(9)  |
| Gd(2)-O(3)        | 2.393(10) | Gd(16)-O(94)        | 2.392(11) |
| Gd(3)-O(4)        | 2.339(9)  | Gd(17)-O(54)        | 2.366(10) |
| Gd(3)-O(16)       | 2.351(9)  | Gd(17)-O(77)        | 2.767(17) |
| Gd(4)-O(6)        | 2.374(9)  | Gd(18)-O(62)        | 2.375(9)  |
| Gd(4)-O(32)       | 2.402(10) | Gd(18)-O(19)        | 2.580(10) |
| Gd(5)-O(46)       | 2.345(9)  | Gd(19)-O(67)        | 2.352(10) |
| Gd(5)-O(16)       | 2.353(9)  | Gd(19)-O(5W)        | 2.628(12) |
| Gd(6)-O(50)       | 2.333(10) | Gd(20)-O(6)         | 2.345(9)  |
| Gd(6)-O(8)        | 2.357(9)  | Gd(20)-O(87)        | 2.353(11) |
| Gd(7)-O(10W)      | 2.360(16) | Gd(21)-O(93)        | 2.362(13) |
| Gd(7)-O(63)       | 2.370(11) | Gd(21)-O(37)        | 2.371(9)  |
| Gd(8)-O(33)       | 2.321(9)  | Gd(22)-O(77)        | 2.905(19) |
| Gd(8)-O(10)       | 2.330(9)  | Gd(22)-O(13)        | 2.341(10) |
| Gd(9)-O(45)       | 2.403(9)  | Gd(23)-O(65)        | 2.354(10) |
| Gd(9)-O(31)       | 2.410(9)  | Gd(23)-O(11)        | 2.354(10) |
| Gd(10)-O(5)       | 2.379(9)  | Gd(24)-O(111)       | 2.317(12) |
| Gd(10)-O(107)     | 2.384(13) | Gd(24)-O(37)        | 2.395(10) |
| Gd(11)-O(46)      | 2.346(9)  | Gd(25)-O(65)        | 2.312(11) |
| Gd(11)-O(25W)     | 2.367(11) | Gd(25)-O(67)        | 2.357(11) |
| Gd(12)-O(31)      | 2.342(10) | Gd(26)-O(75)        | 2.331(11) |
| Gd(12)-O(99)      | 2.367(11) | Gd(26)-O(104)       | 2.334(12) |
| Gd(13)-O(6)       | 2.362(9)  | Gd(27)-O(103)       | 2.322(15) |
| Gd(13)-O(45)      | 2.363(9)  | Gd(27)-O(112)       | 2.331(15) |
| Gd(14)-O(102)     | 2.330(13) | Gd(28)-O(95)        | 2.317(18) |
| Gd(14)-O(8)       | 2.357(9)  | Gd(28)-O(46)        | 2.385(9)  |
| O(39)-Gd(1)-O(79) | 87.0(4)   | O(13)-Gd(15)-O(28)  | 139.9(3)  |
| O(39)-Gd(1)-O(3)  | 140.5(3)  | O(13)-Gd(15)-O(109) | 75.3(4)   |
| O(91)-Gd(2)-O(3)  | 84.2(4)   | O(94)-Gd(16)-O(83)  | 144.6(4)  |
| O(91)-Gd(2)-O(12) | 141.7(4)  | O(11)-Gd(16)-O(83)  | 97.6(4)   |
| O(4)-Gd(3)-O(16)  | 74.2(3)   | O(73)-Gd(17)-O(43)  | 121.2(4)  |
| O(4)-Gd(3)-O(5)   | 143.8(3)  | O(13)-Gd(17)-O(43)  | 141.7(3)  |
| O(6)-Gd(4)-O(32)  | 90.3(3)   | O(62)-Gd(18)-O(11W) | 69.9(4)   |
| O(6)-Gd(4)-O(5)   | 139.4(3)  | O(62)-Gd(18)-O(72)  | 128.7(5)  |
| O(46)-Gd(5)-O(16) | 71.1(3)   | O(67)-Gd(19)-O(49)  | 125.4(3)  |
| O(46)-Gd(5)-O(39) | 143.6(3)  | O(71)-Gd(19)-O(49)  | 145.9(4)  |
| O(50)-Gd(6)-O(8)  | 72.0(3)   | O(6)-Gd(20)-O(87)   | 87.2(4)   |
| O(50)-Gd(6)-O(85) | 68.8(4)   | O(6)-Gd(20)-O(54)   | 130.2(3)  |
| O(63)-Gd(7)-O(35) | 144.7(4)  | O(37)-Gd(21)-O(67)  | 137.1(3)  |
| O(1)-Gd(7)-O(35)  | 77.2(3)   | O(66)-Gd(21)-O(67)  | 70.0(4)   |



|                      |          |                     |          |
|----------------------|----------|---------------------|----------|
| O(33)-Gd(8)-O(10)    | 73.3(3)  | O(97)-Gd(22)-O(40)  | 82.9(5)  |
| O(33)-Gd(8)-O(1)     | 145.0(3) | O(13)-Gd(22)-O(40)  | 140.9(3) |
| O(45)-Gd(9)-O(31)    | 145.2(3) | O(11)-Gd(23)-O(43)  | 74.0(3)  |
| O(45)-Gd(9)-O(33)    | 144.4(3) | O(65)-Gd(23)-O(92)  | 84.9(4)  |
| O(5)-Gd(10)-O(29W)   | 75.0(3)  | O(111)-Gd(24)-O(37) | 82.0(4)  |
| O(107)-Gd(10)-O(29W) | 77.8(4)  | O(111)-Gd(24)-O(65) | 134.5(4) |
| O(25W)-Gd(11)-O(4)   | 123.0(3) | O(65)-Gd(25)-O(67)  | 141.5(4) |
| O(28)-Gd(11)-O(4)    | 139.1(3) | O(65)-Gd(25)-O(81)  | 95.1(4)  |
| O(31)-Gd(12)-O(99)   | 95.2(4)  | O(75)-Gd(26)-O(104) | 143.5(4) |
| O(31)-Gd(12)-O(37)   | 143.5(3) | O(75)-Gd(26)-O(31)  | 91.4(4)  |
| O(6)-Gd(13)-O(59)    | 128.9(3) | O(50)-Gd(27)-O(8)   | 68.7(3)  |
| O(45)-Gd(13)-O(59)   | 67.6(3)  | O(114)-Gd(27)-O(8)  | 141.7(4) |
| O(102)-Gd(14)-O(49)  | 144.9(4) | O(46)-Gd(28)-O(16)  | 68.8(3)  |
| O(8)-Gd(14)-O(49)    | 68.9(3)  | O(8W)-Gd(28)-O(16)  | 140.8(8) |

## References

- 1 X. Y. Zheng, J. B. Peng, X. J. Kong, L. S. Long and L. S. Zheng, Mixed-anion templated cage-like lanthanide clusters: Gd<sub>27</sub> and Dy<sub>27</sub>, *Inorg. Chem. Front.*, 2016, **3**, 320-325.
- 2 L. Qin, G. J. Zhou, Y. Z. Yu, H. Nojiri, C. Schroder, R. E. P. Winpenny and Y. Z. Zheng, Topological Self-Assembly of Highly Symmetric Lanthanide Clusters: A Magnetic Study of Exchange-Coupling "Fingerprints" in Giant Gadolinium(III) Cages, *J. Am. Chem. Soc.*, 2017, **139**, 16405-16411.
- 3 M. Wu, F. Jiang, X. Kong, D. Yuan, L. Long, S. A. Al-Thabaiti and M. Hong, Two polymeric 36-metal pure lanthanide nanosize clusters, *Chem. Sci.*, 2013, **4**, 3104-3109.
- 4 Y. Zhou, X. Y. Zheng, J. Cai, Z. F. Hong, Z. H. Yan, X. J. Kong, Y. P. Ren, L. S. Long and L. S. Zheng, Three Giant Lanthanide Clusters Ln<sub>37</sub> (Ln = Gd, Tb, and Eu) Featuring A Double-Cage Structure, *Inorg. Chem.*, 2017, **56**, 2037-2041.
- 5 F. S. Guo, Y. C. Chen, L. L. Mao, W. Q. Lin, J. D. Leng, R. Tarasenko, M. Orendac, J. Prokleska, V. Sechovsky and M. L. Tong, Anion-templated assembly and magnetocaloric properties of a nanoscale {Gd<sub>38</sub>} cage versus a {Gd<sub>48</sub>} barrel, *Chem. Eur. J.*, 2013, **19**, 14876-14885.
- 6 X. M. Luo, Z. B. Hu, Q. F. Lin, W. Cheng, J. P. Cao, C. H. Cui, H. Mei, Y. Song and Y. Xu, Exploring the Performance Improvement of Magnetocaloric Effect Based Gd-Exclusive Cluster Gd<sub>60</sub>, *J. Am. Chem. Soc.*, 2018, **140**, 11219-11222.
- 7 J. B. Peng, X. J. Kong, Q. C. Zhang, M. Orendac, J. Prokleska, Y. P. Ren, L. S. Long, Z. Zheng and L. S. Zheng, Beauty, symmetry, and magnetocaloric effect-four-shell keplerates with 104 lanthanide atoms, *J. Am. Chem. Soc.*, 2014, **136**, 17938-17941.
- 8 X. Y. Zheng, Y. H. Jiang, G. L. Zhuang, D. P. Liu, H. G. Liao, X. J. Kong, L. S. Long and L. S. Zheng, A Gigantic Molecular Wheel of {Gd<sub>140</sub>}: A New Member of the Molecular Wheel Family, *J. Am. Chem. Soc.*, 2017, **139**, 18178-18181.
- 9 N. F. Li, Q. Wang, J. N. Li, Y. T. Yu and Y. Xu, Two SiO<sub>4</sub><sup>4-</sup>-Templated Ln<sub>23</sub>Ni<sub>20</sub> Clusters with Magnetic Cooling and Stability, *Inorg. Chem.*, 2022, **61**, 7180-7187.
- 10 J. B. Peng, Q. C. Zhang, X. J. Kong, Y. P. Ren, L. S. Long, R. B. Huang, L. S. Zheng and Z. P. Zheng, A 48-Metal Cluster Exhibiting a Large Magnetocaloric Effect, *Angew. Chem. Int. Ed.*, 2011, **50**, 10649-10652.
- 11 J. B. Peng, Q. C. Zhang, X. J. Kong, Y. Z. Zheng, Y. P. Ren, L. S. Long, R. B. Huang, L. S. Zheng and Z. Zheng, High-nuclearity 3d-4f clusters as enhanced magnetic coolers and molecular magnets, *J. Am. Chem. Soc.*, 2012, **134**, 3314-3317.
- 12 H. J. Lun, M. H. Du, D. H. Wang, X. J. Kong, L. S. Long and L. S. Zheng, Double-Propeller-like Heterometallic 3d-4f Clusters Ln<sub>18</sub>Co<sub>7</sub>, *Inorg. Chem.*, 2020, **59**, 7900-7904.
- 13 L. Huang, L. Han, D. Zhu, L. Chen and Y. Xu, Hydrothermal synthesis, crystal structure and luminescence of two new 2D coordination polymers Ln(IN)(CO<sub>3</sub>)(H<sub>2</sub>O) (Ln=La, Eu) constructed by interesting flat lanthanide carbonate layers, *Inorg. Chem. Commun.*, 2012, **21**, 80-83.
- 14 Y. Liu, Y. Zhang, G. H. Hu, S. Zhou, R. Fan, Y. Yang and Y. Xu, A Series of

- Lanthanide Metal-Organic Frameworks with Interesting Adjustable Photoluminescence Constructed by Helical Chains, *Chem. Eur. J.*, 2015, **21**, 10391-10399.
- 15 N. F. Li, J. Ji, W. Jiang, J. P. Cao, Y. M. Han, P. Yuan and Y. Xu, Chirality and Magnetic Properties of One-dimensional Ln (Ln = Gd, Dy) Polymers, *Z. Anorg. Allg. chem.*, 2020, **646**, 463-468.
- 16 L. Chen, L. Huang, D. Zhang, D. Yan, C. Wang, T. Qin, D. Zhu and Y. Xu, Hydrothermal synthesis, crystal structure and properties of two new coordination polymers structured by two mixed ligands and strict quadrangular  $\{Ln_3\}_8$  Units (Ln = Er and Ho), *Inorg. Chem. Commun.*, 2012, **21**, 182-185.
- 17 W. Xu, C. J. Zhang, H. Wang and Y. Wang, Two Novel Two-Dimensional Lanthanide(III) Coordination Polymers Constructed from Isonicotinic Acid and Iminodiacetic Acid: Synthesis, Structure, and Luminescence Properties, *J. Clust. Sci.*, 2017, **28**, 2005-2015.
- 18 J. Y. Lu, J. Macias, J. Lu and J. E. Cmaidalka, An Unforeseen Chemical Rearrangement of Pyridine carboxylate to Oxalate under Hydrothermal Conditions Afforded the First Oxalato and Isonicotinato Mixed-Ligand Guest-Inclusion Coordination Polymer, *Cryst. Growth Des.*, 2002, **2**, 485-487.
- 19 J. N. Li, N. F. Li, J. L. Wang, X. M. Liu, Q. D. Ping, T. T. Zang, H. Mei and Y. Xu, A new family of boat-shaped Ln<sub>8</sub> clusters exhibiting the magnetocaloric effect and slow magnetic relaxation, *Dalton Trans.*, 2021, **50**, 13925-13931.
- 20 Q. Wang, Y. T. Yu, J. L. Wang, J. N. Li, N. F. Li, X. Fan and Y. Xu, Two Windmill-Shaped Ln<sub>18</sub> Nanoclusters Exhibiting High Magnetocaloric Effect and Luminescence, *Inorg. Chem.*, 2023, **62**, 3162-3169.
- 21 L. Chen, L. Huang, C. Wang, J. Fu, D. Zhang, D. Zhu and Y. Xu, Hydrothermal synthesis, structure, and properties of two new nanosized Ln<sub>26</sub> (Ln = Ho, Er) clusters, *J. Coord. Chem.*, 2012, **65**, 958-968.
- 22 L. Chen, J. Y. Guo, X. Xu, W. W. Ju, D. Zhang, D. R. Zhu and Y. Xu, A novel 2-D coordination polymer constructed from high-nuclearity waist drum-like pure Ho<sub>48</sub> clusters, *Chem. Commun.*, 2013, **49**, 9728-9730.
- 23 X. Gu and D. Xue, Surface modification of high-nuclearity lanthanide clusters: Two tetramers constructed by cage-shaped  $\{Dy_{26}\}$  clusters and isonicotinate linkers, *Inorg. Chem.*, 2007, **46**, 3212-3216.
